# Supplementary material for: Silicon Influences Soil Availability and Accumulation of Mineral Nutrients in Various Plant Species
Source: PubMed Central journal article supplement (PMC6027514; doi:10.3390/plants7020041), 2018-05-19
Supplement: plants-07-00041-s001.pdf [file plants-07-00041-s001.pdf]

## Supplement — Greger and Landberg

**Table S1.** Available macronutrient concentration in investigated soils after 90 days treatment with various supplementations of Si. *P*-value indicates if concentration of element increase/decrease with increased Si-treatment. *n*=5,  $\pm$ SE. \*indicates significant difference  $P<0.05$  from the untreated soil.

| Soil type  | Treatment Si kg ha <sup>-1</sup> | K mg kg <sup>-1</sup> | Mg mg kg <sup>-1</sup> | Ca mg kg <sup>-1</sup> | P mg kg <sup>-1</sup> | S mg kg <sup>-1</sup> |
|------------|----------------------------------|-----------------------|------------------------|------------------------|-----------------------|-----------------------|
| Clayey     | 0                                | 177 $\pm$ 8           | 144 $\pm$ 9            | 1459 $\pm$ 59          | 18.1 $\pm$ 0.1        | 12.7 $\pm$ 0.8        |
|            | 80                               | 184 $\pm$ 7           | 139 $\pm$ 9            | 1475 $\pm$ 13          | 19.5 $\pm$ 0.9        | 13.1 $\pm$ 0.7        |
|            | 1000                             | 171 $\pm$ 4           | 131 $\pm$ 4            | 1883 $\pm$ 54*         | 23.2 $\pm$ 0.8*       | 19.2 $\pm$ 1.1*       |
|            | <i>P</i> -value                  | 0.843                 | 0.008*                 | 0.017*                 | 0.014*                | 0.008*                |
| Sandy      | 0                                | 93 $\pm$ 3            | 99 $\pm$ 6             | 710 $\pm$ 11           | 6.1 $\pm$ 0.2         | 7.9 $\pm$ 0.1         |
|            | 80                               | 85 $\pm$ 5            | 89 $\pm$ 6             | 748 $\pm$ 66           | 6.3 $\pm$ 0.6         | 8.5 $\pm$ 0.1         |
|            | 1000                             | 96 $\pm$ 9            | 83 $\pm$ 3*            | 943 $\pm$ 57*          | 6.7 $\pm$ 0.1*        | 8.5 $\pm$ 0.1         |
|            | <i>P</i> -value                  | 0.743                 | 0.018*                 | 0.002*                 | 0.020*                | 0.056                 |
| Alum shale | 0                                | 402 $\pm$ 36          | 170 $\pm$ 2            | 2313 $\pm$ 96          | 17.1 $\pm$ 0.8        | 69.6 $\pm$ 0.2        |
|            | 80                               | 437 $\pm$ 30          | 173 $\pm$ 9            | 2302 $\pm$ 41          | 17.9 $\pm$ 0.0        | 75.6 $\pm$ 3.2        |
|            | 1000                             | 400 $\pm$ 25          | 178 $\pm$ 8            | 2231 $\pm$ 27          | 24.0 $\pm$ 1.1*       | 79.5 $\pm$ 0.2*       |
|            | <i>P</i> -value                  | 0.920                 | 0.039*                 | 0.064                  | 0.007*                | 0.048*                |
| Submerged  | 0                                | 299 $\pm$ 1           | 267 $\pm$ 7            | 2169 $\pm$ 144         | 26.0 $\pm$ 0.9        | 101 $\pm$ 8.4         |
|            | 80                               | 337 $\pm$ 9           | 261 $\pm$ 16           | 1966 $\pm$ 110         | 27.9 $\pm$ 0.8        | 96 $\pm$ 8.4          |
|            | 1000                             | 308 $\pm$ 17          | 278 $\pm$ 23           | 2584 $\pm$ 107*        | 34.1 $\pm$ 0.4*       | 100 $\pm$ 7.1         |
|            | <i>P</i> -value                  | 0.615                 | 0.242                  | 0.276                  | 0.012                 | 0.831                 |

**Table S2.** Available micronutrient concentration in investigated soils after 90 days treatment with various supplementations of Si. *P*-value indicates if concentration of element increase/decrease with increased Si-treatment. n=5,  $\pm$ SE. \*indicates significant difference  $P < 0.05$  from the untreated soil.

| Soil type  | Treatment Si kg/ha | Cl mg/kg     | Mn mg/kg        | Fe mg/kg       | Zn mg/kg       | Cu mg/kg        | Mo $\mu$ g/kg |
|------------|--------------------|--------------|-----------------|----------------|----------------|-----------------|---------------|
| Clayey     | 0                  | 79 $\pm$ 3   | 18 $\pm$ 1.1    | 2926 $\pm$ 73  | 3.2 $\pm$ 0.2  | 2.0 $\pm$ 0.1   | 128 $\pm$ 7   |
|            | 80                 | 76 $\pm$ 5   | 19.1 $\pm$ 1.4  | 2735 $\pm$ 182 | 3.3 $\pm$ 0.1  | 2.0 $\pm$ 0.2   | 131 $\pm$ 2   |
|            | 1000               | 80 $\pm$ 6   | 19.6 $\pm$ 0.7  | 3188 $\pm$ 206 | 4.0 $\pm$ 0.2* | 2.8 $\pm$ 0.2*  | 125 $\pm$ 10  |
|            | <i>P</i> -value    | 0.855        | 0.094           | 0.664          | 0.031*         | 0.100           | 0.689         |
| Sandy      | 0                  | 66 $\pm$ 2   | 14.7 $\pm$ 0.7  | 971 $\pm$ 9    | 1.0 $\pm$ 0.0  | 1.0 $\pm$ 0.0   | 52 $\pm$ 0    |
|            | 80                 | 63 $\pm$ 0   | 14.4 $\pm$ 1.3  | 967 $\pm$ 59   | 1.0 $\pm$ 0.0  | 1.1 $\pm$ 0.0   | 55 $\pm$ 3    |
|            | 1000               | 65 $\pm$ 5   | 9.9 $\pm$ 0.9*  | 1074 $\pm$ 84  | 1.9 $\pm$ 0.1* | 1.1 $\pm$ 0.1   | 63 $\pm$ 2*   |
|            | <i>P</i> -value    | 0.883        | 0.020*          | 0.194          | 0.035*         | 0.087           | 0.018*        |
| Alum shale | 0                  | 182 $\pm$ 12 | 23.1 $\pm$ 2.0  | 4425 $\pm$ 57  | 13.7 $\pm$ 0.0 | 2.0 $\pm$ 0.1   | 95 $\pm$ 4    |
|            | 80                 | 171 $\pm$ 6  | 24.7 $\pm$ 0.9  | 4891 $\pm$ 24  | 12.2 $\pm$ 0.1 | 1.9 $\pm$ 0.1   | 103 $\pm$ 4   |
|            | 1000               | 191 $\pm$ 16 | 29.8 $\pm$ 1.1* | 4925 $\pm$ 463 | 15.9 $\pm$ 1.0 | 2.8 $\pm$ 0.2*  | 146 $\pm$ 8*  |
|            | <i>P</i> -value    | 0.762        | 0.015*          | 0.074          | 0.233          | 0.008*          | 0.004*        |
| Submerged  | 0                  | 113 $\pm$ 9  | 26.6 $\pm$ 1.8  | 2727 $\pm$ 261 | 300 $\pm$ 4    | 25.3 $\pm$ 1.7  | 485 $\pm$ 13  |
|            | 80                 | 126 $\pm$ 3  | 26.4 $\pm$ 1.8  | 2585 $\pm$ 162 | 322 $\pm$ 7    | 27.8 $\pm$ 0.1  | 513 $\pm$ 37  |
|            | 1000               | 129 $\pm$ 4  | 37.4 $\pm$ 3.3* | 2997 $\pm$ 252 | 310 $\pm$ 17   | 34.5 $\pm$ 1.2* | 651 $\pm$ 49* |
|            | <i>P</i> -value    | 0.115        | 0.074           | 0.825          | 0.795          | 0.021*          | 0.009*        |

**Table S3.** Biomass of plants grown in nutrient medium during 5-7 days treatment with or without  $K_2SiO_3$ . n=5,  $\pm$ SE. \*indicates significant difference  $P<0.05$  from the untreated plants.

| Plant species  | $K_2SiO_3$ , ( $\mu$ M) | Shoots           |                 |                   | Roots            |                |                  | Whole plant      |                 |                   | Shoot:whole plant (DW) |
|----------------|-------------------------|------------------|-----------------|-------------------|------------------|----------------|------------------|------------------|-----------------|-------------------|------------------------|
|                |                         | DW (g)           | FW(g)           | DW:FW             | DW (g)           | FW(g)          | DW:FW            | DW (g)           | FW(g)           | DW:FW             |                        |
| <i>Maize</i>   |                         |                  |                 |                   |                  |                |                  |                  |                 |                   |                        |
|                | 0                       | 0.700<br>(0.252) | 10.79<br>(3.97) | 0.065<br>(0.002)  | 0.577<br>(0.077) | 7.06<br>(1.48) | 0.083<br>(0.013) | 1.275<br>(0.273) | 17.85<br>(5.21) | 0.073<br>(0.007)  | 0.548<br>(0.089)       |
|                | 5000                    | 0.988<br>(0.251) | 14.27<br>(3.34) | 0.069*<br>(0.002) | 0.644<br>(0.041) | 8.79<br>(1.08) | 0.074<br>(0.006) | 1.632<br>(0.274) | 23.06<br>(4.32) | 0.071<br>(0.002)  | 0.605<br>(0.056)       |
| <i>Lettuce</i> |                         |                  |                 |                   |                  |                |                  |                  |                 |                   |                        |
|                | 0                       | 5.784<br>(1.344) | 31.27<br>(9.65) | 0.184<br>(0.021)  | 1.167<br>(0.235) | 6.33<br>(1.58) | 0.181<br>(0.017) | 2.08<br>(0.28)   | 37.60<br>(11.0) | 0.56<br>(0.07)    | 0.832<br>(0.081)       |
|                | 1000                    | 4.993<br>(1.194) | 26.58<br>(9.52) | 0.187<br>(0.020)  | 1.057<br>(0.216) | 5.69<br>(1.65) | 0.185<br>(0.019) | 1.74<br>(0.38)   | 32.27<br>(11.1) | 0.59<br>(0.05)    | 0.825<br>(0.042)       |
| <i>Wheat</i>   |                         |                  |                 |                   |                  |                |                  |                  |                 |                   |                        |
|                | 0                       | 2.626<br>(0.130) | 6.69<br>(1.85)  | 0.069<br>(0.005)  | 0.940<br>(0.091) | 4.33<br>(0.42) | 0.082<br>(0.006) | 0.826<br>(0.179) | 11.02<br>(2.21) | 0.075<br>(0.004)  | 0.559<br>(0.041)       |
|                | 1000                    | 2.683<br>(0.113) | 6.98<br>(0.40)  | 0.075<br>(0.002)  | 0.608<br>(0.047) | 4.77<br>(0.13) | 0.090<br>(0.009) | 0.956<br>(0.037) | 11.75<br>(0.44) | 0.081*<br>(0.002) | 0.548<br>(0.040)       |

**Table S4.** Biomass of plants grown in nutrient medium during three weeks treatment with or without K<sub>2</sub>SiO<sub>3</sub>. *P*-value indicates if weights increase/decrease with increased Si-treatment. n=5, ±SE. indicates significant difference *P*<0.05 from the untreated plants.

| Plant species  | Shoot           |         |       | Root    |        |       | Whole plant |        |       | Shoot:<br>Whole<br>plant |         |
|----------------|-----------------|---------|-------|---------|--------|-------|-------------|--------|-------|--------------------------|---------|
|                | Si, μM          | DW, g   | FW, g | DW:FW   | DW, g  | FW, g | DW:FW       | DW, g  | FW, g | DW:FW                    | DW      |
| <b>Wheat</b>   |                 |         |       |         |        |       |             |        |       |                          |         |
|                |                 | 1.59    | 17.9  | 0.089   | 0.39   | 5.8   | 0.068       | 1.98   | 23.6  | 0.084                    | 0.803   |
|                | 0               | (0.01)  | (0.6) | (0.003) | (0.02) | (0.4) | (0.006)     | (0.04) | (0.7) | (0.003)                  | (0.080) |
|                |                 | 1.62    | 18.0  | 0.090   | 0.39   | 5.7   | 0.069       | 2.01   | 23.7  | 0.085                    | 0.806   |
|                | 100             | (0.13)  | (1.8) | (0.011) | (0.01) | (0.7) | (0.008)     | (0.07) | (1.5) | (0.006)                  | (0.073) |
|                |                 | 1.67    | 19.1  | 0.087   | 0.39   | 5.5   | 0.072       | 2.06   | 24.6  | 0.084                    | 0.811   |
|                | 500             | (0.13)  | (2.2) | (0.012) | (0.01) | (0.2) | (0.003)     | (0.07) | (1.2) | (0.005)                  | (0.064) |
|                |                 | 1.70*   | 18.8  | 0.090   | 0.40   | 5.7   | 0.071       | 2.11*  | 24.5  | 0.086                    | 0.806   |
|                | 1000            | (0.01)  | (2.0) | (0.01)  | (0.02) | (0.6) | (0.008)     | (0.04) | (1.5) | (0.006)                  | (0.018) |
|                | <i>P</i> -value | <0.001* | 0.216 | 0.846   | 0.819  | 0.544 | 0.387       | 0.038* | 0.607 | 0.835                    | 0.920   |
| <b>Carrot</b>  |                 |         |       |         |        |       |             |        |       |                          |         |
|                |                 | 0.74    | 7.4   | 0.100   | 0.52   | 5.2   | 0.100       | 1.26   | 12.6  | 0.100                    | 0.587   |
|                | 0               | (0.02)  | (0.4) | (0.006) | (0.05) | (0.5) | (0.014)     | (0.05) | (0.6) | (0.006)                  | (0.041) |
|                |                 | 0.80    | 8.1   | 0.099   | 0.49   | 4.8   | 0.102       | 1.29   | 12.9  | 0.100                    | 0.620   |
|                | 100             | (0.08)  | (0.5) | (0.011) | (0.05) | (0.4) | (0.012)     | (0.07) | (0.5) | (0.007)                  | (0.032) |
|                |                 | 0.77    | 7.6   | 0.101   | 0.53   | 5.3   | 0.101       | 1.30   | 12.9  | 0.101                    | 0.592   |
|                | 500             | (0.02)  | (0.8) | (0.011) | (0.05) | (0.7) | (0.016)     | (0.05) | (0.9) | (0.008)                  | (0.051) |
|                |                 | 0.79*   | 7.8   | 0.101   | 0.56   | 5.5   | 0.103       | 1.36   | 13.3  | 0.102                    | 0.581   |
|                | 1000            | (0.01)  | (1.0) | (0.013) | (0.07) | (0.6) | (0.016)     | (0.07) | (0.9) | (0.008)                  | (0.022) |
|                | <i>P</i> -value | 0.075   | 0.297 | 0.557   | 0.402  | 0.472 | 0.737       | 0.051  | 0.084 | 0.341                    | 0.904   |
| <b>Lettuce</b> |                 |         |       |         |        |       |             |        |       |                          |         |
|                |                 | 3.86    | 20.6  | 0.188   | 0.87   | 4.5   | 0.193       | 4.73   | 25.0  | 0.189                    | 0.816   |
|                | 0               | (0.09)  | (2.7) | (0.025) | (0.00) | (0.1) | (0.005)     | (0.05) | (1.4) | (0.011)                  | (0.035) |
|                |                 | 3.93    | 20.4  | 0.192   | 0.82   | 4.3   | 0.194       | 4.75   | 24.7  | 0.193                    | 0.827   |
|                | 100             | (0.34)  | (2.4) | (0.028) | (0.04) | (0.0) | (0.010)     | (0.19) | (1.2) | (0.012)                  | (0.058) |
|                |                 | 4.05    | 21.3  | 0.190   | 0.83   | 4.2   | 0.197       | 4.88   | 25.5  | 0.191                    | 0.830   |
|                | 500             | (0.28)  | (0.3) | (0.013) | (0.07) | (0.1) | (0.017)     | (0.22) | (0.2) | (0.009)                  | (0.018) |
|                |                 | 4.15*   | 21.7  | 0.191   | 0.82   | 4.3   | 0.191       | 4.97*  | 26.0  | 0.191                    | 0.835   |
|                | 1000            | (0.13)  | (2.1) | (0.019) | (0.01) | (0.1) | (0.005)     | (0.07) | (1.0) | (0.008)                  | (0.048) |
|                | <i>P</i> -value | 0.007*  | 0.205 | 0.289   | 0.044* | 0.194 | 0.862       | 0.010* | 0.182 | 0.794                    | 0.154   |
| <b>Pea</b>     |                 |         |       |         |        |       |             |        |       |                          |         |
|                |                 | 2.78    | 22.0  | 0.126   | 1.28   | 11.4  | 0.112       | 4.05   | 33.4  | 0.121                    | 0.686   |
|                | 0               | (0.25)  | (0.6) | (0.012) | (0.07) | (0.0) | (0.006)     | (0.18) | (0.4) | (0.005)                  | (0.061) |
|                |                 | 2.95    | 23.2  | 0.127   | 1.39   | 12.8  | 0.108       | 4.34   | 36.1  | 0.120                    | 0.680   |
|                | 100             | (0.16)  | (0.6) | (0.008) | (0.08) | (1.4) | (0.013)     | (0.14) | (1.6) | (0.007)                  | (0.024) |
|                |                 | 3.00    | 22.7  | 0.132   | 1.48   | 13.9  | 0.107       | 4.48   | 36.6  | 0.123                    | 0.670   |
|                | 500             | (0.28)  | (1.9) | (0.017) | (0.09) | (1.9) | (0.016)     | (0.21) | (2.4) | (0.010)                  | (0.025) |
|                |                 | 2.91    | 22.5  | 0.129   | 1.47*  | 13.4  | 0.110       | 4.38   | 35.9  | 0.122                    | 0.664   |
|                | 1000            | (0.25)  | (2.5) | (0.018) | (0.10) | (0.2) | (0.008)     | (0.19) | (1.6) | (0.008)                  | (0.045) |
|                | <i>P</i> -value | 0.176   | 0.690 | 0.351   | 0.032  | 0.071 | 0.395       | 0.220  | 0.246 | 0.637                    | 0.666   |

**Table S5.** Concentrations of nutrients in shoots and roots of various plant species untreated and treated with K<sub>2</sub>SiO<sub>3</sub> during 5-7 days. n = 5 (maize and lettuce) and 10 (wheat) ± SE in brackets. \* indicates significant difference from the control.

| Plant Part     | N<br>mg g <sup>-1</sup> | K<br>mg g <sup>-1</sup> | Mg<br>mg g <sup>-1</sup> | Ca<br>mg g <sup>-1</sup> | P<br>mg g <sup>-1</sup> | S<br>mg g <sup>-1</sup> | Cl<br>mg g <sup>-1</sup> | B<br>μg g <sup>-1</sup> | Mn<br>μg g <sup>-1</sup> | Fe<br>μg g <sup>-1</sup> | Zn<br>μg g <sup>-1</sup> | Cu<br>μg g <sup>-1</sup> | Mo<br>μg g <sup>-1</sup> | Si<br>μg g <sup>-1</sup> |
|----------------|-------------------------|-------------------------|--------------------------|--------------------------|-------------------------|-------------------------|--------------------------|-------------------------|--------------------------|--------------------------|--------------------------|--------------------------|--------------------------|--------------------------|
| <i>Maize</i>   |                         |                         |                          |                          |                         |                         |                          |                         |                          |                          |                          |                          |                          |                          |
| Shoot          |                         |                         |                          |                          |                         |                         |                          |                         |                          |                          |                          |                          |                          |                          |
| 0              | 55.4<br>(1.7)           | 19.6<br>(0.7)           | 3.1<br>(0.1)             | 2.4<br>(0.3)             | 1.6<br>(0.1)            | 3.4<br>(0.3)            | 2.3<br>(0.2)             | 3.1<br>(0.5)            | 230<br>(13)              | 264<br>(36)              | 16.5<br>(2.1)            | 9.3<br>(1.1)             | 0.18<br>(0.00)           | 120<br>(18)              |
| 5000           | 48.7*<br>(1.8)          | 20.1<br>(1.1)           | 3.9<br>(0.1)             | 2.9<br>(0.0)             | 1.1*<br>(0.2)           | 3.4<br>(0.3)            | 2.1<br>(0.0)             | 5.9*<br>(0.9)           | 391*<br>(20)             | 209<br>(6)               | 11.8<br>(1.1)            | 5.8*<br>(0.1)            | 0.15<br>(0.01)           | 10294*<br>(1544)         |
| Root           |                         |                         |                          |                          |                         |                         |                          |                         |                          |                          |                          |                          |                          |                          |
| 0              | 56.9<br>(1.3)           | 15.8<br>(1.6)           | 2.7<br>(0.0)             | 1.9<br>(0.2)             | 2.0<br>(0.1)            | 3.8<br>(0.2)            | 3.5<br>(0.1)             | 4.4<br>(0.7)            | 248<br>(1)               | 198<br>(21)              | 29.6<br>(3.6)            | 10.6<br>(0.9)            | 0.09<br>(0.00)           | 115<br>(17)              |
| 5000           | 52.1*<br>(1.1)          | 16.0<br>(1.0)           | 2.7<br>(0.3)             | 1.5<br>(0.1)             | 1.6<br>(0.2)            | 3.7<br>(0.2)            | 3.3<br>(0.0)             | 7.5*<br>(1.1)           | 381*<br>(48)             | 173<br>(25)              | 35.0<br>(1.6)            | 18.4*<br>(0.3)           | 0.09<br>(0.00)           | 14702*<br>(2205)         |
| <i>Lettuce</i> |                         |                         |                          |                          |                         |                         |                          |                         |                          |                          |                          |                          |                          |                          |
| Shoot          |                         |                         |                          |                          |                         |                         |                          |                         |                          |                          |                          |                          |                          |                          |
| 0              | 43.0<br>(0.2)           | 16.8<br>(0.7)           | 1.8<br>(0.1)             | 3.6<br>(0.3)             | 1.7<br>(0.1)            | 1.4<br>(0.2)            | 2.6<br>(0.2)             | 4.9<br>(0.7)            | 73<br>(8)                | 275<br>(32)              | 121<br>(1.5)             | 14.8<br>(1.9)            | 0.29<br>(0.04)           | 26<br>(6)                |
| 1000           | 35.7*<br>(1.5)          | 16.1<br>(0.9)           | 2.0<br>(0.1)             | 4.0<br>(0.5)             | 1.0*<br>(0.0)           | 1.5<br>(0.1)            | 2.7<br>(0.3)             | 6.8*<br>(1.0)           | 94<br>(7)                | 268<br>(5)               | 94<br>(0.8)              | 12.0<br>(0.1)            | 0.30<br>(0.03)           | 882*<br>(132)            |
| Root           |                         |                         |                          |                          |                         |                         |                          |                         |                          |                          |                          |                          |                          |                          |
| 0              | 46.7<br>(1.0)           | 14.9<br>(1.8)           | 1.7<br>(0.0)             | 2.9<br>(0.3)             | 1.9<br>(0.1)            | 1.7<br>(0.1)            | 4.0<br>(0.1)             | 10.6<br>(1.6)           | 101<br>(4)               | 154<br>(22)              | 158<br>(4)               | 26.4<br>(2.1)            | 0.12<br>(0.00)           | 31<br>(4)                |
| 1000           | 41.4*<br>(1.5)          | 14.3<br>(1.5)           | 1.7<br>(0.0)             | 2.8<br>(0.0)             | 1.6<br>(0.1)            | 1.6<br>(0.1)            | 3.9<br>(0.5)             | 15.6<br>(2.3)           | 121*<br>(1)              | 168<br>(5)               | 199*<br>(1)              | 31.8<br>(1.9)            | 0.11<br>(0.01)           | 1776*<br>(266)           |
| <i>Wheat</i>   |                         |                         |                          |                          |                         |                         |                          |                         |                          |                          |                          |                          |                          |                          |
| Shoot          |                         |                         |                          |                          |                         |                         |                          |                         |                          |                          |                          |                          |                          |                          |
| 0              | 37.4<br>(1.1)           | 12.6<br>(0.8)           | 0.9<br>(0.04)            | 1.9<br>(0.2)             | 2.0<br>(0.02)           | 1.6<br>(0.1)            | 3.2<br>(0.2)             | 2.1<br>(0.2)            | 64<br>(4)                | 157<br>(10)              | 85<br>(0.5)              | 8.2<br>(0.5)             | 0.21<br>(0.003)          | 24<br>(1)                |
| 1000           | 31.4*<br>(2.3)          | 11.6<br>(0.2)           | 1.1<br>(0.06)            | 2.0<br>(0.07)            | 1.2*<br>(0.0)           | 1.8<br>(0.05)           | 3.4<br>(0.03)            | 3.4*<br>(0.07)          | 91*<br>(6)               | 176<br>(8)               | 62<br>(0.1)              | 6.1<br>(0.6)             | 0.23<br>(0.02)           | 3535*<br>(157)           |
| Root           |                         |                         |                          |                          |                         |                         |                          |                         |                          |                          |                          |                          |                          |                          |
| 0              | 41.3<br>(2.0)           | 11.8<br>(0.2)           | 0.9<br>(0.07)            | 1.5<br>(0.4)             | 2.2<br>(0.0)            | 1.8<br>(0.0)            | 4.8<br>(0.1)             | 4.6<br>(0.0)            | 92<br>(4)                | 89<br>(22)               | 101<br>(4)               | 14.5<br>(2.1)            | 0.09<br>(0.00)           | 26<br>(5)                |
| 1000           | 39.0<br>(5.0)           | 9.6<br>(0.1)            | 1.0<br>(0.0)             | 1.3<br>(0.0)             | 1.6<br>(0.0)            | 2.1<br>(0.0)            | 4.6<br>(0.5)             | 8.3*<br>(0.0)           | 117*<br>(1)              | 111<br>(5)               | 128*<br>(1)              | 14.7<br>(1.9)            | 0.08<br>(0.01)           | 7798*<br>(528)           |

**Table S6.**

Concentration of various nutrients in shoots and roots of various plant species untreated and treated with silicon for three weeks. *P*-value indicates if concentration of element increase/decrease with increased Si-treatment. *n* = 4,  $\pm$  SE in brackets. \*indicates significant difference from the control.

| Plant           | N                  | K                  | Mg                 | Ca                 | P                  | S                  | Cl                 | Mn                 | Fe                 | Zn                 | Cu                 | Mo                 | Si                 |
|-----------------|--------------------|--------------------|--------------------|--------------------|--------------------|--------------------|--------------------|--------------------|--------------------|--------------------|--------------------|--------------------|--------------------|
| Part            | mg g <sup>-1</sup> | mg g <sup>-1</sup> | mg g <sup>-1</sup> | mg g <sup>-1</sup> | mg g <sup>-1</sup> | mg g <sup>-1</sup> | mg g <sup>-1</sup> | μg g <sup>-1</sup> | μg g <sup>-1</sup> | μg g <sup>-1</sup> | μg g <sup>-1</sup> | μg g <sup>-1</sup> | μg g <sup>-1</sup> |
| Si, μM          |                    |                    |                    |                    |                    |                    |                    |                    |                    |                    |                    |                    |                    |
| Wheat           |                    |                    |                    |                    |                    |                    |                    |                    |                    |                    |                    |                    |                    |
| Shoot           |                    |                    |                    |                    |                    |                    |                    |                    |                    |                    |                    |                    |                    |
| 0               | 39.4<br>(1.1)      | 11.9<br>(0)        | 1.01<br>(0.06)     | 1.9<br>(0.1)       | 2.0<br>(0.1)       | 1.9<br>(0.2)       | 3.4<br>(0.1)       | 62.3<br>(0.8)      | 159<br>(13)        | 92.9<br>(7.4)      | 8.18<br>(0.8)      | 0.21<br>(0)        | 21<br>(2)          |
| 100             | 38.8<br>(0.6)      | 11.5<br>(1.1)      | 1.05<br>(0.06)     | 2<br>(0.2)         | 2.1<br>(0.2)       | 1.7<br>(0.1)       | 3.2<br>(0.2)       | 73.4*<br>(5.8)     | 176*<br>(4)        | 68.1*<br>(6.2)     | 7.05*<br>(0.08)    | 0.216<br>(0.013)   | 2486*<br>(244)     |
| 500             | 36.7<br>(0.7)      | 11.6<br>(0.2)      | 0.96<br>(0.03)     | 2<br>(0.1)         | 1.8<br>(0.1)       | 1.6*<br>(0.1)      | 3.5<br>(0.3)       | 78*<br>(5.8)       | 168<br>(14)        | 59.1*<br>(0.3)     | 5.83*<br>(0.15)    | 0.21<br>(0.007)    | 3711*<br>(160)     |
| 1000            | 36.5*<br>(0.5)     | 11.4<br>(0.4)      | 1.13*<br>(0.01)    | 2.1<br>(0.1)       | 1.8*<br>(0)        | 1.6*<br>(0)        | 3.5<br>(0.2)       | 86*<br>(1.4)       | 171*<br>(6)        | 59.2*<br>(4.1)     | 6.22*<br>(0.3)     | 0.214<br>(0.007)   | 4008*<br>(44)      |
| <i>P</i> -value | 0.032*             | 0.331              | 0.074              | 0.152              | 0.048*             | 0.041*             | 0.093              | <0.001*            | 0.010*             | <0.001*            | <0.001*            | 0.681              | <0.001*            |
| Root            |                    |                    |                    |                    |                    |                    |                    |                    |                    |                    |                    |                    |                    |
| 0               | 38.9<br>(5.1)      | 11.4<br>(0.4)      | 0.94<br>(0.01)     | 1.4<br>(0.1)       | 2.2<br>(0.2)       | 2.7<br>(0.1)       | 4.9<br>(0.1)       | 102<br>(5.5)       | 87<br>(8)          | 102.7<br>(3.9)     | 15.29<br>(0.1)     | 0.1<br>(0.005)     | 36<br>(4)          |
| 100             | 39.0<br>(3.1)      | 9.5*<br>(0.4)      | 1.02*<br>(0.02)    | 1.4<br>(0)         | 2.1<br>(0)         | 2.5<br>(0.1)       | 4.7<br>(0.5)       | 124.8*<br>(3.5)    | 112*<br>(4)        | 124*<br>(6.1)      | 14.47<br>(1)       | 0.105<br>(0.006)   | 3870*<br>(152)     |
| 500             | 38.1<br>(4.3)      | 10.1*<br>(0.1)     | 0.97<br>(0.01)     | 1.4<br>(0.1)       | 1.7<br>(0.2)       | 2.0*<br>(0.1)      | 4.9<br>(0.1)       | 117.8*<br>(6.8)    | 124*<br>(7)        | 129.4*<br>(9.5)    | 14.09<br>(1.09)    | 0.08*<br>(0.004)   | 7045*<br>(451)     |
| 1000            | 37.4<br>(2.1)      | 10*<br>(0.3)       | 0.94<br>(0.02)     | 1.4<br>(0.1)       | 1.7<br>(0.2)       | 2.0*<br>(0)        | 4.8<br>(0.4)       | 127.4*<br>(5.5)    | 115*<br>(4)        | 136*<br>(4.3)      | 14.2*<br>(0.35)    | 0.084*<br>(0.005)  | 8439*<br>(721)     |
| <i>P</i> -value | 0.051              | 0.040*             | 0.359              | 0.894              | 0.002              | <0.001*            | 0.815              | 0.009*             | 0.013*             | <0.001*            | 0.018*             | 0.025*             | <0.001*            |
| Carrot          |                    |                    |                    |                    |                    |                    |                    |                    |                    |                    |                    |                    |                    |
| Shoot           |                    |                    |                    |                    |                    |                    |                    |                    |                    |                    |                    |                    |                    |
| 0               | 49.8<br>(0.2)      | 8.5<br>(0.6)       | 0.7<br>(0.02)      | 1.5<br>(0)         | 1.5<br>(0.1)       | 1.2<br>(0.1)       | 2.4<br>(0.1)       | 47.6<br>(0.4)      | 113<br>(3)         | 65.6<br>(6.3)      | 5.96<br>(0.28)     | 0.146<br>(0.009)   | 22<br>(2)          |
| 100             | 49.9<br>(4.0)      | 8.4<br>(0.4)       | 0.73<br>(0.06)     | 1.4<br>(0)         | 1.5<br>(0.1)       | 1.2<br>(0.1)       | 2.4<br>(0.1)       | 50<br>(2.7)        | 130*<br>(0)        | 51.1*<br>(2.7)     | 4.96*<br>(0.46)    | 0.164<br>(0.004)   | 158*<br>(4)        |
| 500             | 47.5<br>(6.7)      | 8.6<br>(0.5)       | 0.71<br>(0.05)     | 1.5<br>(0.1)       | 1.4<br>(0.1)       | 1.2<br>(0.1)       | 2.4<br>(0.2)       | 57.5*<br>(4.4)     | 127*<br>(11)       | 46.1*<br>(0.2)     | 4.35*<br>(0.21)    | 0.16<br>(0)        | 344*<br>(17)       |
| 1000            | 46.3<br>(0.3)      | 8.3<br>(0.4)       | 0.81*<br>(0.07)    | 1.5<br>(0.1)       | 1.3<br>(0.1)       | 1.0*<br>(0.0)      | 2.4<br>(0.2)       | 66.4*<br>(2.7)     | 131*<br>(11)       | 42.3*<br>(0.4)     | 4.4*<br>(0.37)     | 0.155<br>(0.001)   | 586*<br>(9)        |
| <i>P</i> -value | 0.045*             | 0.597              | 0.068              | 0.744              | 0.034*             | 0.100              | 0.911              | <0.001*            | 0.002*             | <0.001*            | 0.009*             | 0.117              | <0.001*            |
| Root            |                    |                    |                    |                    |                    |                    |                    |                    |                    |                    |                    |                    |                    |

|                 |        |        |         |        |         |         |        |         |         |         |         |         |         |
|-----------------|--------|--------|---------|--------|---------|---------|--------|---------|---------|---------|---------|---------|---------|
|                 | 52.9   | 8.8    | 0.68    | 1.0    | 1.6     | 1.5     | 3.5    | 73.5    | 67      | 71.1    | 10.69   | 0.072   | 27      |
| 0               | (4.6)  | (0.7)  | (0.04)  | (0.1)  | (0)     | (0)     | (0.2)  | (2.1)   | (6)     | (1.1)   | (0.9)   | (0.003) | (1)     |
|                 | 52.8   | 7.2*   | 0.72    | 1.1    | 1.5     | 1.4     | 3.4    | 87.6*   | 84      | 89.3*   | 10.58   | 0.074   | 415*    |
| 100             | (7.2)  | (0.4)  | (0)     | (0)    | (0.1)   | (0)     | (0.2)  | (4.7)   | (4)     | (0.8)   | (0.48)  | (0.003) | (35)    |
|                 | 50.5   | 7.4*   | 0.69    | 1.1    | 1.3*    | 1.2*    | 3.4    | 84.7*   | 84      | 96*     | 10.27   | 0.059*  | 977*    |
| 500             | (7.4)  | (0)    | (0)     | (0.1)  | (0.1)   | (0)     | (0.3)  | (2.5)   | (8)     | (7)     | (0.41)  | (0.002) | (5)     |
|                 | 50.3   | 7.1*   | 0.70    | 1.3*   | 1.2*    | 1.2*    | 3.5    | 95.9*   | 85      | 95.6*   | 10.48   | 0.057*  | 1364*   |
| 1000            | (5.4)  | (0.3)  | (0.01)  | (0)    | (0.1)   | (0.1)   | (0.1)  | (9.2)   | (6)     | (6.9)   | (0.45)  | (0.002) | (46)    |
| <i>P</i> -value | 0.072  | 0.030* | 0.572   | 0.014* | 0.005*  | 0.009*  | 0.855  | 0.011*  | 0.022*  | 0.004*  | 0.124*  | <0.001* | <0.001* |
| Lettuce         |        |        |         |        |         |         |        |         |         |         |         |         |         |
| Shoot           |        |        |         |        |         |         |        |         |         |         |         |         |         |
|                 | 46.2   | 16.7   | 0.98    | 2.7    | 2.7     | 2.4     | 4.3    | 86.3    | 216     | 119.8   | 10.52   | 0.277   | 26      |
| 0               | (3.0)  | (0.9)  | (0.04)  | (0.1)  | (0.1)   | (0.2)   | (0.1)  | (5.4)   | (7)     | (3.4)   | (0.77)  | (0.007) | (1)     |
|                 | 44.9   | 15.8   | 1.03    | 2.7    | 2.8     | 2.3     | 4.4    | 94.5    | 230     | 97.1*   | 9.28*   | 0.287   | 96*     |
| 100             | (0.1)  | (1.3)  | (0.06)  | (0.1)  | (0.2)   | (0.1)   | (0.3)  | (8.2)   | (15)    | (2.1)   | (0.61)  | (0.012) | (7)     |
|                 | 44.3   | 16.1   | 1.01    | 2.7    | 2.5     | 2.3     | 4.6    | 110.2*  | 237*    | 82.7*   | 8.37*   | 0.301   | 512*    |
| 500             | (2.2)  | (0.7)  | (0.04)  | (0.2)  | (0.1)   | (0.2)   | (0)    | (3.8)   | (19)    | (4.1)   | (0.55)  | (0.014) | (16)    |
|                 | 42.9   | 15.3*  | 1.15*   | 2.8    | 2.4*    | 2.1     | 4.7*   | 121*    | 243*    | 82.9*   | 8.23*   | 0.305*  | 887*    |
| 1000            | (1.0)  | (0.4)  | (0.03)  | (0.2)  | (0.2)   | (0.1)   | (0.3)  | (11.7)  | (9)     | (1.5)   | (0.39)  | (0.016) | (60)    |
| <i>P</i> -value | 0.017* | 0.047* | 0.048*  | 0.356  | 0.038*  | 0.019*  | 0.010* | <0.001* | <0.001* | <0.001* | <0.001* | <0.001* | <0.001* |
| Root            |        |        |         |        |         |         |        |         |         |         |         |         |         |
|                 | 47.3   | 14.9   | 1.02    | 1.7    | 2.7     | 2.7     | 5.8    | 116.7   | 110     | 122.3   | 17.4    | 0.117   | 31      |
| 0               | (1.4)  | (0.6)  | (0.03)  | (0)    | (0.1)   | (0.1)   | (0.4)  | (5.9)   | (3)     | (11.7)  | (1.53)  | (0.009) | (0)     |
|                 | 47.2   | 12.2*  | 1.04    | 1.7    | 2.5     | 2.5     | 5.8    | 144.7*  | 137*    | 149.7*  | 17.88   | 0.12    | 762*    |
| 100             | (2.3)  | (0.1)  | (0.04)  | (0)    | (0.2)   | (0)     | (0.1)  | (13.2)  | (4)     | (5.1)   | (1.74)  | (0.007) | (9)     |
|                 | 45.9   | 11.8*  | 1.02    | 1.8    | 2       | 2.2*    | 5.4    | 138.9*  | 140*    | 153.1*  | 17.29   | 0.098*  | 1528*   |
| 500             | (5.7)  | (0.9)  | (0.05)  | (0.2)  | (0.2)   | (0.1)   | (0.1)  | (11.9)  | (1)     | (12.2)  | (0.6)   | (0.007) | (57)    |
|                 | 45.6   | 12.2*  | 0.98    | 1.7    | 2       | 2.1*    | 5.5    | 159.5*  | 147*    | 160.4*  | 16.23   | 0.099*  | 1844*   |
| 1000            | (0.5)  | (0.9)  | (0.01)  | (0.1)  | (0.2)   | (0)     | (0.2)  | (8.9)   | (13)    | (6.7)   | (0.45)  | (0.004) | (165)   |
| <i>P</i> -value | 0.068  | 0.037* | 0.153   | 0.804  | <0.001* | <0.001* | 0.046* | 0.028*  | <0.001* | <0.001* | 0.084   | 0.092   | <0.001* |
| Pea             |        |        |         |        |         |         |        |         |         |         |         |         |         |
| Shoot           |        |        |         |        |         |         |        |         |         |         |         |         |         |
|                 | 66.5   | 17.2   | 1.47    | 2.8    | 2.8     | 2.3     | 4.7    | 93.6    | 235     | 134.7   | 11.58   | 0.294   | 19      |
| 0               | (3.6)  | (1.4)  | (0.08)  | (0.1)  | (0.3)   | (0.2)   | (0.3)  | (8)     | (11)    | (10.7)  | (0.83)  | (0.024) | (2)     |
|                 | 63.3   | 17.1   | 1.40    | 2.7    | 3.1*    | 2.5     | 4.7    | 104.5   | 260*    | 99.8*   | 9.82*   | 0.32    | 108*    |
| 100             | (7.8)  | (0.3)  | (0.07)  | (0)    | (0)     | (0.2)   | (0.2)  | (6.4)   | (10)    | (1.4)   | (0.41)  | (0.009) | (3)     |
|                 | 62.4   | 16.5)  | 1.39    | 2.7    | 2.8     | 2.5     | 5.1*   | 114.5*  | 260*    | 87.5*   | 8.56*   | 0.318   | 355*    |
| 500             | (2.4)  | (1)    | (0.06)  | (0.1)  | (0.1)   | (0.1)   | (0.2)  | (7.5)   | (23)    | (2.5)   | (0.21)  | (0.005) | (18)    |
|                 | 61     | 17.1   | 1.63    | 2.7    | 2.6     | 2.6*    | 5.2*   | 134*    | 255*    | 87.2*   | 8.54*   | 0.319   | 641*    |
| 1000            | (4.8)  | (1.7)  | (0.08)* | (0)    | (0)     | (0)     | (0.1)  | (0.7)   | (2)     | (1.5)   | (0.37)  | (0.014) | (16)    |
| <i>P</i> -value | 0.036* | 0.243  | 0.216   | 0.385  | 0.470   | 0.033*  | 0.026* | <0.001* | 0.058   | <0.001* | <0.001* | 0.192   | <0.001* |

|                 |       |       |        |       |       |        |       |        |        |        |         |         |         |
|-----------------|-------|-------|--------|-------|-------|--------|-------|--------|--------|--------|---------|---------|---------|
| Root            |       |       |        |       |       |        |       |        |        |        |         |         |         |
|                 | 62.2  | 15.6  | 1.85   | 1.9   | 2.4   | 2.6    | 5.8   | 125.8  | 115    | 129.1  | 19.4    | 0.128   | 21      |
| 0               | (0.4) | (0.3) | (0.11) | (0)   | (0)   | (0)    | (0.5) | (6.4)  | (1)    | (8.1)  | (0.37)  | (0.000) | (1)     |
|                 | 60.5  | 12.2* | 1.78   | 1.7*  | 2.2   | 2.5    | 5.8   | 153.3* | 139*   | 150.8* | 19.12   | 0.123   | 549*    |
| 100             | (7.3) | (1)   | (0.01) | (0)   | (0.2) | (0.2)  | (0.5) | (6.5)  | (11)   | (12)   | (1.82)  | (0.008) | (48)    |
|                 | 60.7  | 12.2* | 1.87   | 1.8   | 2.2   | 2.0*   | 6     | 152.7* | 156*   | 165.1* | 17.91*  | 0.096*  | 1070*   |
| 500             | (7.8) | (0.1) | (0.05) | (0.1) | (0.1) | (0.1)  | (0.2) | (13.8) | (8)    | (13.1) | (0.14)  | (0.008) | (71)    |
|                 | 60.2  | 12.3* | 1.80   | 1.8   | 2.2   | 2.0*   | 6     | 161.6* | 152*   | 160.7* | 17.32*  | 0.097*  | 1477*   |
| 1000            | (1.1) | (0.1) | (0.05) | (0)   | (0)   | (0.2)  | (0.4) | (0.3)  | (7)    | (14.6) | (1.33)  | (0.002) | (48)    |
| <i>P</i> -value | 0.078 | 0.059 | 0.261  | 0.125 | 0.064 | 0.008* | 0.098 | 0.004* | 0.002* | 0.031* | <0.001* | 0.015*  | <0.001* |



**Table S7**

Net accumulation (total uptake of element per g of root DW) of various elements in maize, wheat and lettuce untreated and treated with silicon for 5-7 days. n = 5 (maize and lettuce) or 10 (wheat)  $\pm$  SE in brackets. \* indicates significant difference from the control.

| Plant       | N                  | K                  | Mg                 | Ca                 | P                  | S                  | Cl                 | B                       | Mn                      | Fe                      | Zn                      | Cu                      | Mo                      | Si                 |
|-------------|--------------------|--------------------|--------------------|--------------------|--------------------|--------------------|--------------------|-------------------------|-------------------------|-------------------------|-------------------------|-------------------------|-------------------------|--------------------|
| Si, $\mu$ M | mg g <sup>-1</sup> | mg g <sup>-1</sup> | mg g <sup>-1</sup> | mg g <sup>-1</sup> | mg g <sup>-1</sup> | mg g <sup>-1</sup> | mg g <sup>-1</sup> | $\mu$ g g <sup>-1</sup> | $\mu$ g g <sup>-1</sup> | $\mu$ g g <sup>-1</sup> | $\mu$ g g <sup>-1</sup> | $\mu$ g g <sup>-1</sup> | $\mu$ g g <sup>-1</sup> | mg g <sup>-1</sup> |
| Maize       |                    |                    |                    |                    |                    |                    |                    |                         |                         |                         |                         |                         |                         |                    |
| 0           | 12.4<br>(1.2)      | 3.96<br>(0.42)     | 0.65<br>(0.06)     | 0.40<br>(0.06)     | 0.49<br>(0.04)     | 0.79<br>(0.08)     | 0.63<br>(0.06)     | 8.1<br>(1.0)            | 526<br>(49)             | 463<br>(64)             | 49<br>(6)               | 21<br>(2)               | 0.30<br>(0.02)          | 0.26<br>(0.03)     |
| 5000        | 12.7<br>(0.8)      | 4.68*<br>(0.34)    | 0.97*<br>(0.07)    | 0.60*<br>(0.04)    | 0.33*<br>(0.03)    | 0.91<br>(0.07)     | 0.65<br>(0.03)     | 16.5*<br>(1.6)          | 980*<br>(80)            | 517<br>(40)             | 33 *<br>(4)             | 27*<br>(1)              | 0.32<br>(0.02)          | 30.49*<br>(3.14)   |
| Lettuce     |                    |                    |                    |                    |                    |                    |                    |                         |                         |                         |                         |                         |                         |                    |
| 0           | 26.0<br>(0.20)     | 9.84<br>(0.09)     | 1.09<br>(0.09)     | 2.10<br>(0.22)     | 1.05<br>(0.10)     | 0.91<br>(0.1)      | 1.72<br>(0.15)     | 34.8<br>(4.2)           | 462<br>(44)             | 1433<br>(175)           | 757<br>(50)             | 88<br>(7)               | 1.55<br>(0.14)          | 0.16<br>(0.02)     |
| 1000        | 21.0*<br>(0.19)    | 9.03*<br>(0.01)    | 1.10<br>(0.09)     | 2.20<br>(0.21)     | 0.66*<br>(0.06)    | 0.88<br>(0.09)     | 1.69<br>(0.20)     | 47.7*<br>(5.9)          | 565*<br>(49)            | 1517<br>(117)           | 643*<br>(40)            | 99<br>(10)              | 1.52<br>(0.16)          | 5.94*<br>(0.74)    |
| Wheat       |                    |                    |                    |                    |                    |                    |                    |                         |                         |                         |                         |                         |                         |                    |
| 0           | 14.6<br>(0.9)      | 4.70<br>(0.61)     | 0.36<br>(0.33)     | 0.69<br>(0.10)     | 0.76<br>(0.04)     | 0.64<br>(0.01)     | 1.38<br>(0.15)     | 10.5<br>(0.98)          | 271<br>(14)             | 528<br>(42)             | 338<br>(20)             | 37<br>(4)               | 0.70<br>(0.04)          | 0.10<br>(0.01)     |
| 1000        | 17.7<br>(1.1)      | 6.06<br>(0.42)     | 0.58<br>(0.01)     | 1.01*<br>(0.06)    | 0.68*<br>(0.02)    | 1.00*<br>(0.09)    | 1.98*<br>(0.21)    | 23.3<br>(1.31)          | 519*<br>(32)            | 587<br>(51)             | 303<br>(28)             | 42<br>(1)               | 1.10*<br>(0.08)         | 23.40*<br>(1.41)   |

**Table S8.**

Net accumulation of various elements in wheat, carrot, pea and lettuce untreated and treated with  $K_2SiO_3$  for three weeks. *P*-value indicates if concentration of element increase/decrease with increased Si-treatment.  $n = 4 \pm SE$  in brackets. Asterisk (\*) means significant difference from the control.

| Plant           | Si, $\mu M$ | N           | K             | Mg            | Ca            | P             | S              | Cl             | Mn           | Fe             | Zn           | Cu             | Mo              | Si               |
|-----------------|-------------|-------------|---------------|---------------|---------------|---------------|----------------|----------------|--------------|----------------|--------------|----------------|-----------------|------------------|
|                 |             | $\mu g/g$   | $\mu g/g$     | $\mu g/g$     | $\mu g/g$     | $\mu g/g$     | $\mu g/g$      | $\mu g/g$      | $\mu g/g$    | $\mu g/g$      | $\mu g/g$    | $\mu g/g$      | $\mu g/g$       | $\mu g/g$        |
| Wheat           |             |             |               |               |               |               |                |                |              |                |              |                |                 |                  |
|                 | 0           | 199<br>(7)  | 60<br>(2.5)   | 5.1<br>(0.3)  | 9.3<br>(0.5)  | 10.5<br>(0.5) | 8.1<br>(0.6)   | 18.6<br>(0.8)  | 355<br>(17)  | 735<br>(54)    | 481<br>(28)  | 48.5<br>(3)    | 0.95<br>(0.04)  | 121<br>(9)       |
|                 | 100         | 200<br>(1)  | 57<br>(3.8)   | 5.4<br>(0.3)  | 9.8<br>(0.6)  | 10.8<br>(0.6) | 9<br>(0.5)     | 18.1<br>(1.2)  | 429<br>(25)  | 841<br>(40)    | 406<br>(27)  | 43.7<br>(2.4)  | 1.00<br>(0.06)  | 14167*<br>(951)  |
|                 | 500         | 194<br>(10) | 59.1<br>(3.9) | 5<br>(0.2)    | 9.8<br>(0.5)  | 9.3<br>(0.5)  | 8.9<br>(0.6)   | 19.8<br>(1.3)  | 448*<br>(29) | 838<br>(57)    | 380*<br>(22) | 38.8*<br>(2.3) | 0.97<br>(0.05)  | 22782*<br>(1328) |
|                 | 1000        | 191<br>(11) | 57.9<br>(2.6) | 5.7<br>(0.3)  | 10.1<br>(0.5) | 9.4<br>(0.4)  | 10*<br>(0.4)   | 19.6<br>(1.3)  | 490*<br>(21) | 837<br>(36)    | 386*<br>(20) | 40.4*<br>(1.8) | 0.99<br>(0.05)  | 25328*<br>(1430) |
| <i>P</i> -value |             | 0.101       | 0.752         | 0.133         | 0.046*        | 0.144         | 0.070          | 0.201          | <0.001*      | 0.052          | 0.042*       | 0.042*         | 0.086           | <0.001*          |
| Carrot          |             |             |               |               |               |               |                |                |              |                |              |                |                 |                  |
|                 | 0           | 124<br>(8)  | 21.1<br>(1.9) | 1.7<br>(0.1)  | 3.2<br>(0.3)  | 3.7<br>(0.3)  | 3<br>(0.3)     | 6.9<br>(0.6)   | 142<br>(12)  | 229<br>(19)    | 165<br>(16)  | 19.2<br>(1.7)  | 1.01<br>(0.28)  | 59<br>(5)        |
|                 | 100         | 134<br>(7)  | 20.8<br>(2)   | 1.9<br>(0.2)  | 3.3<br>(0.3)  | 3.9<br>(0.4)  | 3.4<br>(0.3)   | 7.2<br>(0.7)   | 168<br>(17)  | 295<br>(28)    | 172<br>(17)  | 18.6<br>(2)    | 1.13<br>(0.34)  | 671*<br>(64)     |
|                 | 500         | 120<br>(6)  | 20<br>(1.8)   | 1.7<br>(0.2)  | 3.2<br>(0.3)  | 3.3<br>(0.3)  | 3.3<br>(0.3)   | 7<br>(0.6)     | 168<br>(16)  | 269<br>(25)    | 163<br>(14)  | 16.6<br>(1.5)  | 1.31<br>(0.29)  | 1478*<br>(129)   |
|                 | 1000        | 115<br>(9)  | 18.8<br>(2.1) | 1.8<br>(0.2)  | 3.1<br>(0.3)  | 3.1<br>(0.4)  | 3.3<br>(0.4)   | 6.9<br>(0.8)   | 189<br>(20)  | 269<br>(31)    | 155<br>(17)  | 16.7<br>(2)    | 1.36<br>(0.28)  | 2188*<br>(233)   |
| <i>P</i> -value |             | 0.088       | 0.031*        | 0.376         | 0.508         | 0.069         | 0.165          | 0.742          | <0.001*      | 0.106          | 0.125        | 0.038          | 0.684           | <0.001*          |
| Lettuce         |             |             |               |               |               |               |                |                |              |                |              |                |                 |                  |
|                 | 0           | 253<br>(15) | 89.4<br>(3.3) | 7.1<br>(0.3)  | 13.7<br>(0.4) | 14.7<br>(0.4) | 12<br>(0.6)    | 24.7<br>(1)    | 501<br>(21)  | 1072<br>(27)   | 656<br>(34)  | 64.3<br>(3.8)  | 1.35<br>(0.06)  | 147<br>(4)       |
|                 | 100         | 261<br>(9)  | 87.5<br>(6.6) | 7.3<br>(0.5)  | 14.6<br>(1)   | 15.9<br>(1.3) | 13.5<br>(0.9)  | 26.6<br>(2)    | 595<br>(53)  | 1234<br>(88)   | 612<br>(40)  | 62.1<br>(5.3)  | 1.49<br>(0.11)  | 1219*<br>(87)    |
|                 | 500         | 262<br>(13) | 90.5<br>(8.4) | 7.8<br>(0.7)  | 15.1<br>(1.6) | 14.4<br>(1.4) | 13.5<br>(1.2)  | 27.7<br>(2.3)  | 677*<br>(64) | 1296*<br>(119) | 557<br>(53)  | 58.2<br>(5.2)  | 1.57<br>(0.14)  | 4030*<br>(345)   |
|                 | 1000        | 264<br>(18) | 90.2<br>(5.7) | 8.9*<br>(0.5) | 15.8<br>(0.8) | 14.4<br>(1)   | 14.7*<br>(0.4) | 29.6*<br>(1.3) | 775*<br>(46) | 1381*<br>(72)  | 582<br>(18)  | 58.1<br>(2)    | 1.65*<br>(0.06) | 6357*<br>(380)   |
| <i>P</i> -value |             | 0.130       | 0.618         | <0.001*       | 0.027*        | 0.276         | <0.001*        | <0.001*        | <0.001*      | <0.001*        | 0.046        | 0.082          | <0.001*         | <0.001*          |

| Pea             |        |       |       |        |       |       |       |         |       |         |         |        |         |
|-----------------|--------|-------|-------|--------|-------|-------|-------|---------|-------|---------|---------|--------|---------|
|                 | 207    | 53    | 4.4   | 8.1    | 8.9   | 7.3   | 16.1  | 329     | 626   | 422     | 44.6    | 0.77   | 62      |
| 0               | (16)   | (4.1) | (0.3) | (0.6)  | (0.7) | (0.6) | (1.4) | (27)    | (44)  | (35)    | (3.4)   | (0.06) | (5)     |
|                 | 195    | 48.4  | 4.4   | 8      | 9.2   | 7.8   | 15.7  | 375     | 690   | 362     | 39.9    | 0.80   | 778*    |
| 100             | (5)    | (3.4) | (0.3) | (0.5)  | (0.6) | (0.7) | (1.1) | (25)    | (49)  | (25)    | (3)     | (0.05) | (56)    |
|                 | 187    | 45.7  | 4     | 7.8    | 7.9   | 7.7   | 16.3  | 385     | 683   | 343     | 35.3    | 0.74   | 1791*   |
| 500             | (8)    | (3.5) | (0.3) | (0.6)  | (0.7) | (0.6) | (1.2) | (35)    | (60)  | (29)    | (2.6)   | (0.06) | (149)   |
|                 | 181    | 46.1  | 4.4   | 7.5    | 7.3   | 7.7   | 15.6  | 427     | 655   | 333     | 34.2    | 0.73   | 2745*   |
| 1000            | (11)   | (4.1) | (0.3) | (0.6)  | (0.5) | (0.6) | (1.3) | (31)    | (50)  | (29)    | (2.9)   | (0.06) | (208)   |
| <i>P</i> -value | 0.039* | 0.060 | 0.877 | 0.047* | 0.057 | 0.101 | 0.681 | <0.001* | 0.095 | <0.001* | <0.001* | 0.062  | <0.001* |
